# Supplementary material for: Design procedures and experimental verification of an electro-thermal deicing system for wind turbines
Source: Copernicus journal article supplement (doi:10.5194/wes-6-1291-2021), 2021-10-06
Supplement: Supplementary file 1 [file Deicing Proposal_06-23-19_Phase 1.xlsx]

## Sheet: SOW
			MAX CURRENT ALLOWED	100	A
			Voltage Requested rms	480	V
			Voltage Requested	339.411	Vrms
			Max current	294.628	Irms
			Power	100000	Watts
			Blade radius	45	m
			Coverage chord	1	m
			Coverage	24.975	m^2	per zone of 45 m span x 0.74 x 1 m
			Blades	3
			Zones/blade	4
			Power Density/Zone	4004	W/m^2
			Power Density/Zone	0.4004	W/cm^2
			Power Density/Zone	2.58322	W/in^2
				Jose's gut feeling: 5 w/in^2 needed at a minimum to prevent major run-back issues

## Sheet: Test Matrix
	Phase 1
		Test Type	Variac (VAC)	RMS Voltage (VAC)	RMS Current (A)	Heater Resistance (ohms)	Power (Watts)	Power Density (W/cm^2)	LWC (g/m^3)	Temp (-°C)	MVD (microns)	Accretion RPM	Accretion Time (mins)	Ice Thickness (mm)	Ice Thickness (in)	Shedding RPM	Time of 1st Shed (secs)	Time of 2nd Shed (secs)
	Test Case 1	Adhesion	300	212.1	2.48	85.5242	527	0.39	0.4	-8	20	400	2	1.95	0.0767717	90	No Shed (melt)	No Shed (melt)
	Test Case 2	Adhesion	300	212.1	2.48	85.5242	527	0.39	0.4	-8	20	400	5	5.5	0.216536	90	39	71
	Test Case 3	Adhesion	300	212.1	2.48	85.5242	527	0.39	0.4	-8	20	400	5	5.5	0.216536	90	65	71
	Test Case 4	Cohesive Failure	300	212.1	2.48	85.5242	527	0.39	0.4	-8	20	400	5	5.6	0.220473	90	Failure	Failure
	Test Case 5	Cohesive Failure	300	212.1	2.48	85.5242	527	0.39	0.4	-8	20	400	5	5.5	0.216536	90	Failure	Failure
	Test Case 6	Adhesion	300	212.1	2.48	85.5242	527	0.39	0.4	-8	20	400	10	10	0.393701	90	24	39
	Test Case 7	Adhesion	300	212.1	2.45	86.5714	520	0.38	0.4	-8	20	400	10	10.5	0.413386	90	47	48
	Test Case 8	Cohesive Failure	300	212.1	2.48	85.5242	527	0.38	0.4	-8	20	400	10	10.5	0.413386	90	Failure	Failure
	February 2019 Testing (Icing Conditions - MEDIUM)
	Zone CF Test Cases (to find min thickness to shed for each zone)
	Test Case 9 Zone 4	Cohesive Failure	300	212.1	2.48	85.5242	527	0.38	0.4	-8	20	400	10	10.5	0.413386	220	11	14
	Test Case 10 Zone 4	Cohesive Failure	300	212.1	2.48	85.52	527	0.38	0.4	-8	20	400	5	6.5	0.255906	286	17	Failure (Blue)
	Test Case 11 Zone 4	Cohesive Failure	300	212.1	2.48	85.52	527	0.38	0.4	-8	20	400	6	8	0.314961	286	24	66
	Test Case 12 Zone 4	Cohesive Failure	300	212.1	2.48	85.52	527	0.38	0.4	-8	20	400	6	7.8	0.307087	286	66	67
	Test Case 13 Zone 4	Cohesive Failure	300	212.1	2.48	85.52	527	0.38	0.4	-8	20	400	5	6.5	0.255906	286	23	Failure (Blue)
	Test Case 14 Zone 4	Accretion Thickness	N/A	N/A	N/A	N/A	N/A	N/A	0.4	-8	20	174	5	3.5	0.137795	N/A	N/A	N/A
	Test Case 15 Zone 3	Accretion Thickness	N/A	N/A	N/A	N/A	N/A	N/A	0.4	-8	20	289	5	5.2	0.204725	N/A	N/A	N/A
	Test Case 16 Zone 2	Cohesive Failure	300	212.1	2.48	85.5242	527	0.38	0.4	-8	20	400	2	2.1	0.0826772	437	47	48 Partial Failure (White)
	Test Case 17 Zone 2	Cohesive Failure	300	212.1	2.48	85.5242	527	0.38	0.4	-8	20	400	2	2	0.0787402	437	Partial Failure	Partial Failure
	Test Case 18 Zone 2	Cohesive Failure	300	212.1	2.48	85.5242	527	0.38	0.4	-8	20	400	3	2.9	0.114173	437	24	31
	Test Case 19 Zone 2	Cohesive Failure	300	212.1	2.48	85.5242	527	0.38	0.4	-8	20	400	3	2.8	0.110236	437	36	37
	Test Case 20 Zone 3	Cohesive Failure	300	212.1	2.45	86.5714	520	0.38	0.4	-8	20	400	3	3	0.11811	369	55	56	Possible Clogged Nozzle Accretion seems to be ~2 nozzles
	Test Case 21 Zone 3	Cohesive Failure	300	212.1	2.45	86.5714	520	0.38	0.4	-8	20	400	3	2.6	0.102362	369	56	57 Partial Failure (Blue)
	Test Case 22 Zone 3	Cohesive Failure	300	212.1	2.45	86.5714	520	0.38	0.4	-8	20	400	4	3.9	0.153543	369	83	84 Partial Failure (Blue)
	Test Case 23 Zone 3	Cohesive Failure	300	212.1	2.45	86.5714	520	0.38	0.4	-8	20	400	4	3.7	0.145669	369	31	Failure (Blue)
	Test Case 24 Zone 3	Cohesive Failure	300	212.1	2.45	86.5714	520	0.38	0.4	-8	20	400	4	3.7	0.145669	369	23	Failure (Blue)
	Power Variation (to see how shedding times vary)
	Test Case 25 Zone 3	Power Variation	300	212.1	2.45	86.5714	520	0.38	0.4	-8	20	400	4	5	0.19685	369	25	26
	Test Case 26 Zone 3	Power Variation	275	194.425	2.29	84.9017	445	0.325	0.4	-8	20	400	4	5.1	0.200788	369	33	43
	Test Case 27 Zone 3	Power Variation	250	176.75	2.11	83.7678	371	0.27	0.4	-8	20	400	4	5.2	0.204725	369	82	83
	Test Case 28 Zone 3	Power Variation	225	159.075	1.96	81.1607	311	0.227	0.4	-8	20	400	4	4.8	0.188976	369	Failure >180	Failure >180
	April 2019 Testing (Icing Conditions - MEDIUM)
	Zone CF Test Cases (to find min thickness to shed for each zone)
		Test Type	Variac (VAC)	RMS Voltage (VAC)	RMS Current (A)	Heater Resistance (ohms)	Power (Watts)	Power Density (W/cm^2)	LWC (g/m^3)	Temp (-°C)	MVD (microns)	Accretion RPM	Accretion Time (mins)	Ice Thickness (mm)	Ice Thickness (in)	Shedding RPM	Time of 1st Shed (secs)	Time of 2nd Shed (secs)
	Test Case 29 Zone 2	Cohesive Failure	300	212.1	2.48	85.5242	527	0.385	0.4	-8	20	400	3	3.5	0.137795	437	22	24
	Test Case 30 Zone 2	Cohesive Failure	300	212.1					0.4	-8	20	400	3			437
	Test Case 31 Zone 3	Cohesive Failure	300	212.1	2.48	85.5242	527	0.385	0.4	-8	20	400	4	5.1	0.200788	369	25	26
	Test Case 32 Zone 3	Cohesive Failure	300	212.1					0.4	-8	20	400	4			369
	Linear Ice Accretion (for 3 & 7 mins; 5 mins is already completed)
	Test Case 33 Zone 4	Accretion Thickness	N/A	N/A	N/A	N/A	N/A	N/A	0.4	-8	20	174	3	2.3	0.0905512	N/A	N/A	N/A
	Test Case 34 Zone 3	Accretion Thickness	N/A	N/A	N/A	N/A	N/A	N/A	0.4	-8	20	289	3	3.4	0.133858	N/A	N/A	N/A
	Test Case 35 Zone 2	Accretion Thickness	N/A	N/A	N/A	N/A	N/A	N/A	0.4	-8	20	405	3	4.1	0.161417	N/A	N/A	N/A
	Test Case 36 Zone 4	Accretion Thickness	N/A	N/A	N/A	N/A	N/A	N/A	0.4	-8	20	174	7	5.3	0.208662	N/A	N/A	N/A
	Test Case 37 Zone 3	Accretion Thickness	N/A	N/A	N/A	N/A	N/A	N/A	0.4	-8	20	289	7	7.4	0.291339	N/A	N/A	N/A
	Test Case 38 Zone 2	Accretion Thickness	N/A	N/A	N/A	N/A	N/A	N/A	0.4	-8	20	405	7	8.8	0.346457	N/A	N/A	N/A
	Power Variation
	Test Case 39 Zone 4	Power Variation	300	212.1	2.48	85.5242	527	0.385	0.4	-8	20	400	6	7.3	0.287402	286	18	25
	Test Case 40 Zone 4	Power Variation	275	194.425	2.35	82.734	457	0.33	0.4	-8	20	400	6	6.8	0.267717	286	30	34
	Test Case 41 Zone 4	Power Variation	250	176.75	2.12	83.3726	375	0.27	0.4	-8	20	400	6	7.3	0.287402	286	64	66
	Test Case 42 Zone 4	Power Variation	225	159.075	1.96	81.1607	311	0.227	0.4	-8	20	400	6	7.3	0.287402	286	73	>180
	Test Case 43 Zone 2	Power Variation	300	212.1	2.52	84.1667	533	0.39	0.4	-8	20	400	3	3.7	0.145669	437	24	25
	Test Case 44 Zone 2	Power Variation	275	194.425	2.32	83.8039	451	0.33	0.4	-8	20	400	3	3.7	0.145669	437	56	57
	Test Case 45 Zone 2	Power Variation	250	176.75	2.16	81.8287	381	0.278	0.4	-8	20	400	3	3.8	0.149606	437	85	86
	Test Case 46 Zone 2	Power Variation	225	159.075	1.96	81.1607	311	0.227	0.4	-8	20	400	3	3.8	0.149606	437	>180	>180
	May - June 2019 Testing (Icing Conditions - LIGHT)
	Zone CF Test Cases (to find min thickness to shed for each zone)
	Test Case 47 Zone 4	Cohesive Failure	300	212.1	2.48	85.5242	527	0.39	0.2	-8	20	400	7	6	0.236221	286	24	25
	Test Case 48 Zone 4	Cohesive Failure	300	212.1	2.48	85.5242	527	0.39	0.2	-8	20	400	6	5	0.19685	286	45	54
	Test Case 49 Zone 3	Cohesive Failure	300	212.1	2.48	85.5242	527	0.39	0.2	-8	20	400	5	4.3	0.169291	369	23	24
	Test Case 50 Zone 3	Cohesive Failure	300	212.1	2.48	85.5242	527	0.39	0.2	-8	20	400	4	3.5	0.137795	369	29	31
	Test Case 51 Zone 2	Cohesive Failure	300	212.1	2.48	85.5242	527	0.39	0.2	-8	20	400	3	2.8	0.110236	437	28	29
	Test Case 52 Zone 2	Cohesive Failure	300	212.1					0.2	-8	20	400	3			437
	Linear Ice Accretion (for 3, 5 & 7 mins)
	Test Case 53 Zone 4	Accretion Thickness	N/A	N/A	N/A	N/A	N/A	N/A	0.2	-8	20	174	3	1.9	0.0748032	N/A	N/A	N/A
	Test Case 54 Zone 3	Accretion Thickness	N/A	N/A	N/A	N/A	N/A	N/A	0.2	-8	20	289	3	2.8	0.110236	N/A	N/A	N/A
	Test Case 55 Zone 2	Accretion Thickness	N/A	N/A	N/A	N/A	N/A	N/A	0.2	-8	20	405	3	3	0.11811	N/A	N/A	N/A
	Test Case 56 Zone 4	Accretion Thickness	N/A	N/A	N/A	N/A	N/A	N/A	0.2	-8	20	174	5	3.7	0.145669	N/A	N/A	N/A
	Test Case 57 Zone 3	Accretion Thickness	N/A	N/A	N/A	N/A	N/A	N/A	0.2	-8	20	289	5	4.5	0.177165	N/A	N/A	N/A
	Test Case 58 Zone 2	Accretion Thickness	N/A	N/A	N/A	N/A	N/A	N/A	0.2	-8	20	405	5	5	0.19685	N/A	N/A	N/A
	Test Case 59 Zone 4	Accretion Thickness	N/A	N/A	N/A	N/A	N/A	N/A	0.2	-8	20	174	7	4.7	0.185039	N/A	N/A	N/A
	Test Case 60 Zone 3	Accretion Thickness	N/A	N/A	N/A	N/A	N/A	N/A	0.2	-8	20	289	7	6.7	0.26378	N/A	N/A	N/A
	Test Case 61 Zone 2	Accretion Thickness	N/A	N/A	N/A	N/A	N/A	N/A	0.2	-8	20	405	7	7.2	0.283465	N/A	N/A	N/A
	Power Variation
	Test Case 62 Zone 4	Power Variation	300	212.1	2.48	85.5242	527	0.39	0.2	-8	20	400	7	6.8	0.267717	286	24	32
	Test Case 63 Zone 4	Power Variation	275	194.425	2.32	83.8039	451	0.33	0.2	-8	20	400	7	6.8	0.267717	286	34	36
	Test Case 64 Zone 4	Power Variation	250	176.75	2.16	81.8287	381	0.28	0.2	-8	20	400	7	6.8	0.267717	286	82	84
	Test Case 65 Zone 4	Power Variation	225	159.075					0.2	-8	20	400	7			286
	Test Case 66 Zone 3	Power Variation	300	212.1	2.48	85.5242	527	0.39	0.2	-8	20	400	4	3.9	0.153543	369	25	26
	Test Case 67 Zone 3	Power Variation	275	194.425	2.32	83.8039	451	0.33	0.2	-8	20	400	4	3.8	0.149606	369	48	49
	Test Case 68 Zone 3	Power Variation	250	176.75	2.16	81.8287	381	0.28	0.2	-8	20	400	4	4	0.15748	369	>180	>180
	Test Case 69 Zone 3	Power Variation	225	159.075					0.2	-8	20	400	4			369
	Test Case 70 Zone 2	Power Variation	300	212.1	2.48	85.5242	527	0.39	0.2	-8	20	400	3	3	0.11811	437	28	29
	Test Case 71 Zone 2	Power Variation	275	194.425	2.32	83.8039	451	0.33	0.2	-8	20	400	3	3.2	0.125984	437	57	58
	Test Case 72 Zone 2	Power Variation	250	176.75	2.16	81.8287	381	0.28	0.2	-8	20	400	3	3.2	0.125984	437	67	68
	Test Case 73 Zone 2	Power Variation	225	159.075					0.2	-8	20	400	3			437
	June 2019 Testing (Icing Conditions - SEVERE)
	Zone CF Test Cases (to find min thickness to shed for each zone)
		Test Type	Variac (VAC)	RMS Voltage (VAC)	RMS Current (A)	Heater Resistance (ohms)	Power (Watts)	Power Density (W/cm^2)	LWC (g/m^3)	Temp (-°C)	MVD (microns)	Accretion RPM	Accretion Time (mins)	Ice Thickness (mm)	Ice Thickness (in)	Shedding RPM	Time of 1st Shed (secs)	Time of 2nd Shed (secs)
	Test Case 74 Zone 4	Cohesive Failure	300	212.1	2.48	85.5242	527	0.39	0.9	-8	35	400	5	7.2	0.283465	286	34	50
	Test Case 75 Zone 4	Cohesive Failure	300	212.1	2.48	85.5242	527	0.39	0.9	-8	35	400	5	7.2	0.283465	286	55	56
	Test Case 76 Zone 3	Cohesive Failure	300	212.1	2.48	85.5242	527	0.39	0.9	-8	35	400	4	5.3	0.208662	369	23	24
	Test Case 77 Zone 3	Cohesive Failure	300	212.1	2.48	85.5242	527	0.39	0.9	-8	35	400	3	4.7	0.185039	369	36	>60
	Test Case 78 Zone 2	Cohesive Failure	300	212.1	2.48	85.5242	527	0.39	0.9	-8	35	400	3	4.7	0.185039	437	17	20
	Test Case 79 Zone 2	Cohesive Failure	300	212.1	2.48	85.5242	527	0.39	0.9	-8	35	400	2	3.5	0.137795	437	34	>60
	Linear Ice Accretion (for 3, 5 & 7 mins)
	Test Case 80 Zone 4	Accretion Thickness	N/A	N/A	N/A	N/A	N/A	N/A	0.9	-8	35	174	3	3.7	0.145669	N/A	N/A	N/A
	Test Case 81 Zone 3	Accretion Thickness	N/A	N/A	N/A	N/A	N/A	N/A	0.9	-8	35	289	3	5	0.19685	N/A	N/A	N/A
	Test Case 82 Zone 2	Accretion Thickness	N/A	N/A	N/A	N/A	N/A	N/A	0.9	-8	35	405	3	6.5	0.255906	N/A	N/A	N/A
	Test Case 83 Zone 4	Accretion Thickness	N/A	N/A	N/A	N/A	N/A	N/A	0.9	-8	35	174	5	5.3	0.208662	N/A	N/A	N/A
	Test Case 84 Zone 3	Accretion Thickness	N/A	N/A	N/A	N/A	N/A	N/A	0.9	-8	35	289	5	7.5	0.295276	N/A	N/A	N/A
	Test Case 85 Zone 2	Accretion Thickness	N/A	N/A	N/A	N/A	N/A	N/A	0.9	-8	35	405	5	9.5	0.374016	N/A	N/A	N/A
	Test Case 86 Zone 4	Accretion Thickness	N/A	N/A	N/A	N/A	N/A	N/A	0.9	-8	35	174	7	8	0.314961	N/A	N/A	N/A
	Test Case 87 Zone 3	Accretion Thickness	N/A	N/A	N/A	N/A	N/A	N/A	0.9	-8	35	289	7	10.5	0.413386	N/A	N/A	N/A
	Test Case 88 Zone 2	Accretion Thickness	N/A	N/A	N/A	N/A	N/A	N/A	0.9	-8	35	405	7	12	0.472441	N/A	N/A	N/A
	Power Variation
	Test Case 89 Zone 4	Power Variation	300	212.1					0.9	-8	35	400	6			286
	Test Case 90 Zone 4	Power Variation	275	194.425					0.9	-8	35	400	6			286
	Test Case 91 Zone 4	Power Variation	250	176.75					0.9	-8	35	400	6			286
	Test Case 92 Zone 4	Power Variation	225	159.075					0.9	-8	35	400	6			286
	Test Case 93 Zone 3	Power Variation	300	212.1					0.9	-8	35	400	4			369
	Test Case 94 Zone 3	Power Variation	275	194.425					0.9	-8	35	400	4			369
	Test Case 95 Zone 3	Power Variation	250	176.75					0.9	-8	35	400	4			369
	Test Case 96 Zone 3	Power Variation	225	159.075					0.9	-8	35	400	4			369
	Test Case 97 Zone 2	Power Variation	300	212.1					0.9	-8	35	400	3			437
	Test Case 98 Zone 2	Power Variation	275	194.425					0.9	-8	35	400	3			437
	Test Case 99 Zone 2	Power Variation	250	176.75					0.9	-8	35	400	3			437
	Test Case 100 Zone 2	Power Variation	225	159.075					0.9	-8	35	400	3			437

## Sheet: CF Calculations
	Radius from root to each WT Zone
	r1 (m)	r2 (m)	r3 (m)	r4 (m)	r5 (m)		WT (RPM)		WT (rad/sec)			Length of WT Zone (m)			Radius in AERTS (m) (1.397m - 6")
	36	28	20	12	N/A		18		1.88496			8			1.2446
INPUT	Ice Thickness (mm)
	6
	Ice Area (0.231") (m^2)			Density (kg/m^3)			WT Ice Mass (kg)		AERTS Ice Mass (kg)			Length of AERTS Zone (m)
	0.000260124			917			1.90827		0.072705			0.3048
	Zone 1				Zone 2				Zone 3				Zone 4
	CF Force	244.087	Newtons		CF Force	189.845	Newtons		CF Force	135.604	Newtons		CF Force	81.3623	Newtons
	Ω in AERTS	51.9368	rad/sec		Ω in AERTS	45.8039	rad/sec		Ω in AERTS	38.7114	rad/sec		Ω in AERTS	29.9857	rad/sec
	Ω in AERTS	495.96	RPM		Ω in AERTS	437.395	RPM		Ω in AERTS	369.667	RPM		Ω in AERTS	286.342	RPM

## Sheet: Tip Velocities
	Velocity Matching
		Span %	Velocity (m/s)	RPM in AERTS
	12m	0.267	22.65	174
	20m	0.444	37.66	289
	28m	0.622	52.76	405
	36m	0.8	67.86	521

## Sheet: Linear Ice Accretion
			Ice Thickness (mm)
			WT ZONE	Span %	LIGHT				MEDIUM				SEVERE
					3 mins	5 mins	7 mins	Thickness per min	3 mins	5 mins	7 mins	Thickness per min	3 mins	5 mins	7 mins	Thickness per min
			4	26.7	1.7	3.2	4.6	0.725	2.1	3.5	5.2	0.775	3.5	5.5	8	1.125
			3	44.4	2.4	4.4	6.2	0.95	3.2	5.2	7.1	0.975	5	7.5	10.5	1.375
			2	62.2	3	5.2	7.5	1.125	3.9	6.5	8.6	1.175	6.5	9.5	12.8	1.575
						MEDIUM								LIGHT							SEVERE
						3 mins			26.7	2.1				3 mins		26.7	1.7				3 mins	26.7	3.5
									44.4	3.2						44.4	2.4					44.4	5
									62.2	3.9						62.2	3					62.2	6.5
						5 mins			Span %	Thickness (mm)				5 mins		Span %	Thickness (mm)				5 mins	Span %	Thickness (mm)
									0							0						0
									26.7	3.5						26.7	3.2					26.7	5.5
									44.4	5.2						44.4	4.4					44.4	7.5
									62.2	6.5						62.2	5.2					62.2	9.5
									80							80						80
						7 mins			26.7	5.2				7 mins		26.7	4.6				7 mins	26.7	8
									44.4	7.1						44.4	6.2					44.4	10.5
									62.2	8.6						62.2	7.5					62.2	12.8

## Sheet: Min. Shedding Thicknesses
	Properties			Light	Medium	Severe	Average
	Variac Voltage	Zone	Inner Zone Boundary Span %	Min Thickness need to Shed (mm)	Min Thickness need to Shed (mm)	Min Thickness need to Shed (mm)	Min Thickness need to Shed (mm)
	300	4	0.267	6	6.8	7.2	6.66667
	300	3	0.444	4	5	5	4.66667
	300	2	0.622	2.8	3.7	4	3.5
	300	1	0.8	2.5	3.2	3.8	3.16667

## Sheet: Power Variation
Zone 4
Power Density	Voltage	Shed time - light	Shed time - medium
0.385	300	28	22
0.33	275	35	32
0.27	250	83	65
0.225	225	180	180
Zone 3
Power Density	Voltage	Shed time - light	Shed time - medium
0.385	300	25	25
0.33	275	48	38
0.27	250	88	82
0.225	225	180	180
Zone 2
Power Density	Voltage	Shed time - light	Shed time - medium
0.385	300	28	24
0.33	275	47	57
0.27	250	67	85
0.225	225	180	180
			25

## Sheet: Digitzed Areas
					NOT OFFICIAL (MUST RE-DO)
					Digitized Area (m^2)
					Test Case 6		Test Case 5		Test Case 9
					0.21" thickness		0.41" thickness		0.41" thickness							Online Digitizer
					0.001348		0.00094842		16.0469 cm^2							Light	2.5	3.219
																Light	2.8	4.361
																Medium	3.2	4.436
																Medium	3.7	5.861
Digitzer Online																Severe	3.8	6.128
Ice Accretion Area/Mass																Light	4	6.184
	Light				Medium				Severe							Severe	4	6.204
	Zone 1	Zone 2	Zone 3	Zone 4	Zone 1	Zone 2	Zone 3	Zone 4	Zone 1	Zone 2	Zone 3	Zone 4				Medium	5	8.179
Photo ID	DSC_6605	DSC_6599	DSC_6608	DSC_6581	DSC_6602	DSC_6611	DSC_6627	DSC_6581	DSC_6611	DSC_6608	DSC_6587	DSC_6578				Severe	5	10.511
Test Case #	21	19	22	13	20	23	26	13	23	22	15	12				Light	6	10.864
Min Thickness (mm)	2.5	2.8	4	6	3.2	3.7	5	6.8	3.8	4	5	7.2				Medium	6.8	9.652
Area (cm^2)	3.219	4.361	6.184	10.864	4.436	5.861	8.179	9.652	6.128	6.204	10.511	11.86				Severe	7.2	11.86
Mass (kg)
GetData Graph Digitizer
Ice Accretion Area/Mass																			Accretion Rate (mm/min)
	Light				Medium				Severe				Average						Light				Medium				Severe				Average
	Zone 1	Zone 2	Zone 3	Zone 4	Zone 1	Zone 2	Zone 3	Zone 4	Zone 1	Zone 2	Zone 3	Zone 4	Zone 1	Zone 2	Zone 3	Zone 4			Zone 1	Zone 2	Zone 3	Zone 4	Zone 1	Zone 2	Zone 3	Zone 4	Zone 1	Zone 2	Zone 3	Zone 4	Zone 1	Zone 2	Zone 3	Zone 4
Photo ID	DSC_6605	DSC_6599	DSC_6608	DSC_6581	DSC_6602	DSC_6611	DSC_6627	DSC_6581	DSC_6611	DSC_6608	DSC_6587	DSC_6578							1.35	1.125	0.95	0.725	1.45	1.175	0.975	0.775	1.85	1.575	1.375	1.125	1.55	1.29167	1.1	0.875
Test Case #	21	19	22	13	20	23	26	13	23	22	15	12
Min Thickness (mm)	2.5	2.8	4	6	3.2	3.7	5	6.8	3.8	4	5	7.2	3.16667	3.5	4.6667	6.66667
Area (cm^2)	3.068	3.99	5.558	8.861	4.084	4.631	6.3	9.788	4.981	5.592	8.115	10.863	4.084	4.4	6.1	9.4										7
Mass (kg)	857.511	1115.21	1553.47	2476.66	1141.48	1294.37	1760.86	2735.76	1392.2	1562.97	2268.16	3036.23	1141.48	1229.81	1704.96	2627.32
CF Force (N)	3792.21	4931.85	6869.98	10952.7	5048.04	5724.16	7787.13	12098.5	6156.78	6912	10030.6	13427.2	5048.04	5438.63	7539.92	11618.9
	80	62.2	44.4	26.7																							.

## Sheet: Controller
	Severe Icing Condition								Medium Icing Condition								Light Icing Condition
		Accretion Rate (mm/min)	Min Thickness Needed (mm)	Time Duration Needed (mins)	Time Duration Needed (secs)					Accretion Rate (mm/min)	Min Thickness Needed (mm)	Time Duration Needed (mins)	Time Duration Needed (secs)					Accretion Rate (mm/min)	Min Thickness Needed (mm)	Time Duration Needed (mins)	Time Duration Needed (secs)
	Zone 1	1.85	3.8	2.05405	123.243				Zone 1	1.45	3.2	2.2069	132.414				Zone 1	1.35	2.5	1.85185	111.111
	Zone 2	1.575	4	2.53968	152.381				Zone 2	1.175	3.7	3.14894	188.936				Zone 2	1.125	2.8	2.48889	149.333
	Zone 3	1.375	5	3.63636	218.182				Zone 3	0.975	5	5.12821	307.692				Zone 3	0.95	4	4.21053	252.632
	Zone 4	1.125	7.2	6.4	384				Zone 4	0.775	6.8	8.77419	526.452				Zone 4	0.725	6	8.27586	496.552
	Controller Sequence								Controller Sequence								Controller Sequence
	Time	Zone Shed	Ice Thickness Accumulation (mm)						Time	Zone Shed	Ice Thickness Accumulation (mm)						Time	Zone Shed	Ice Thickness Accumulation (mm)
			Zone 1	Zone 2	Zone 3	Zone 4					Zone 1	Zone 2	Zone 3	Zone 4					Zone 1	Zone 2	Zone 3	Zone 4
	0								0								0
	30		0.925	0.7875	0.6875	0.5625			30		0.725	0.5875	0.4875	0.3875			30		0.675	0.5625	0.475	0.3625
	60		1.85	1.575	1.375	1.125			60		1.45	1.175	0.975	0.775			60		1.35	1.125	0.95	0.725
	90		2.775	2.3625	2.0625	1.6875			90		2.175	1.7625	1.4625	1.1625			90		2.025	1.6875	1.425	1.0875
	120		3.7	3.15	2.75	2.25			120		2.9	2.35	1.95	1.55			120		2.7	2.25	1.9	1.45
	150	Z1 - Shed	4.625	3.9375	3.4375	2.8125			150		3.625	2.9375	2.4375	1.9375			150		3.375	2.8125	2.375	1.8125
	180		0	4.725	4.125	3.375			180		4.35	3.525	2.925	2.325			180		4.05	3.375	2.85	2.175
	180	Z2 - Shed	0	4.725	4.125	3.375			210	Z1 - Shed	5.075	4.1125	3.4125	2.7125			210	Z1 - Shed	4.725	3.9375	3.325	2.5375
	210		0.925	0	4.8125	3.9375			240		0	4.7	3.9	3.1			240		0	4.5	3.8	2.9
	240		1.85	0.7875	5.5	4.5			240	Z2 - Shed	0	4.7	3.9	3.1			240	Z2 - Shed	0	4.5	3.8	2.9
	270		2.775	1.575	6.1875	5.0625			270		0.725	0	4.3875	3.4875			270		0.675	0	4.275	3.2625
	300		3.7	2.3625	6.875	5.625			300		1.45	0.5875	4.875	3.875			300		1.35	0.5625	4.75	3.625
	330	Z1 - Shed	4.625	3.15	7.5625	6.1875			330		2.175	1.175	5.3625	4.2625			330		2.025	1.125	5.225	3.9875
	360		0	3.9375	8.25	6.75			360		2.9	1.7625	5.85	4.65			360		2.7	1.6875	5.7	4.35
	360	Z2 - Shed	0	3.9375	8.25	6.75			390		3.625	2.35	6.3375	5.0375			390		3.375	2.25	6.175	4.7125
	390		0.925	0	8.9375	7.3125			420		4.35	2.9375	6.825	5.425			420		4.05	2.8125	6.65	5.075
	390	Z3 - Shed	0.925	0	8.9375	7.3125			450		5.075	3.525	7.3125	5.8125			450		4.725	3.375	7.125	5.4375
	420		1.85	0.7875	0	7.875			480	Z1 - Shed	5.8	4.1125	7.8	6.2			480		5.4	3.9375	7.6	5.8
	420	Z4 - Shed	1.85	0.7875	0	7.875			510		0	4.7	8.2875	6.5875			510	Z1 - Shed	6.075	4.5	8.075	6.1625
	450		2.775	1.575	0.6875	0			510	Z2 - Shed	0	4.7	8.2875	6.5875			540		0	5.0625	8.55	6.525
	480		3.7	2.3625	1.375	0.5625			540		0.725	0	8.775	6.975			540	Z2 - Shed	0	5.0625	8.55	6.525
	510		4.625	3.15	2.0625	1.125			540	Z3 - Shed	0.725	0	8.775	6.975			570		0.675	0	9.025	6.8875
	540		5.55	3.9375	2.75	1.6875			570		1.45	0.5875	0	7.3625			570	Z3 - Shed	0.675	0	9.025	6.8875
	570	Z1 - Shed	6.475	4.725	3.4375	2.25			570	Z4 - Shed	1.45	0.5875	0	7.3625			600		1.35	0.5625	0	7.25
	600		0	5.5125	4.125	2.8125			600		2.175	1.175	0.4875	0			600	Z4 - Shed	1.35	0.5625	0	7.25
	600	Z2 - Shed	0	5.5125	4.125	2.8125			630		2.9	1.7625	0.975	0.3875			630		2.025	1.125	0.475	0
	630		0.925	0	4.8125	3.375			660		3.625	2.35	1.4625	0.775			660		2.7	1.6875	0.95	0.3625
	660		1.85	0.7875	5.5	3.9375			690		4.35	2.9375	1.95	1.1625			690		3.375	2.25	1.425	0.725
	690		2.775	1.575	6.1875	4.5			720		5.075	3.525	2.4375	1.55			720		4.05	2.8125	1.9	1.0875
	720		3.7	2.3625	6.875	5.0625			750		5.8	4.1125	2.925	1.9375			750		4.725	3.375	2.375	1.45
	750	Z1 - Shed	4.625	3.15	7.5625	5.625			780		6.525	4.7	3.4125	2.325			780		5.4	3.9375	2.85	1.8125
	780		0	3.9375	8.25	6.1875			810	Z1 - Shed	7.25	5.2875	3.9	2.7125			810		6.075	4.5	3.325	2.175
	780	Z2 - Shed	0	3.9375	8.25	6.1875			840		0	5.875	4.3875	3.1			840		6.75	5.0625	3.8	2.5375
	810		0.925	0	8.9375	6.75			840	Z2 - Shed	0	5.875	4.3875	3.1			870	Z1 - Shed	7.425	5.625	4.275	2.9
	810	Z3 - Shed	0.925	0	8.9375	6.75			870		0.725	0	4.875	3.4875			900		0	6.1875	4.75	3.2625
	840		1.85	0.7875	0	7.3125			900		1.45	0.5875	5.3625	3.875			900	Z2 - Shed	0	6.1875	4.75	3.2625
	840	Z4 - Shed	1.85	0.7875	0	7.3125			930		2.175	1.175	5.85	4.2625			930		0.675	0	5.225	3.625
	870		2.775	1.575	0.6875	0			960		2.9	1.7625	6.3375	4.65			960		1.35	0.5625	5.7	3.9875
	900		3.7	2.3625	1.375	0.5625			990		3.625	2.35	6.825	5.0375			990		2.025	1.125	6.175	4.35
	930		4.625	3.15	2.0625	1.125			1020		4.35	2.9375	7.3125	5.425			1020		2.7	1.6875	6.65	4.7125
	960		5.55	3.9375	2.75	1.6875			1050		5.075	3.525	7.8	5.8125			1050		3.375	2.25	7.125	5.075
	990	Z1 - Shed	6.475	4.725	3.4375	2.25			1080	Z1 - Shed	5.8	4.1125	8.2875	6.2			1080		4.05	2.8125	7.6	5.4375
	1020		0	5.5125	4.125	2.8125			1110		0	4.7	8.775	6.5875			1110		4.725	3.375	8.075	5.8
	1020	Z2 - Shed	0	5.5125	4.125	2.8125			1110	Z2 - Shed	0	4.7	8.775	6.5875			1140	Z1 - Shed	5.4	3.9375	8.55	6.1625
	1050		0.925	0	4.8125	3.375			1140		0.725	0	9.2625	6.975			1170		0	4.5	9.025	6.525
	1080		1.85	0.7875	5.5	3.9375			1140	Z3 - Shed	0.725	0	9.2625	6.975			1170	Z2 - Shed	0	4.5	9.025	6.525
	1110		2.775	1.575	6.1875	4.5			1170		1.45	0.5875	0	7.3625			1200		0.675	0	9.5	6.8875
	1140		3.7	2.3625	6.875	5.0625			1170	Z4 - Shed	1.45	0.5875	0	7.3625			1200	Z3 - Shed	0.675	0	9.5	6.8875
	1170	Z1 - Shed	4.625	3.15	7.5625	5.625			1200		2.175	1.175	0.4875	0			1230		1.35	0.5625	0	7.25
	1200		0	3.9375	8.25	6.1875			1230		2.9	1.7625	0.975	0.3875			1230	Z4 - Shed	1.35	0.5625	0	7.25
	1200	Z2 - Shed	0	3.9375	8.25	6.1875			1260		3.625	2.35	1.4625	0.775			1260		2.025	1.125	0.475	0
	1230		0.925	0	8.9375	6.75			1290		4.35	2.9375	1.95	1.1625			1290		2.7	1.6875	0.95	0.3625
	1230	Z3 - Shed	0.925	0	8.9375	6.75			1320		5.075	3.525	2.4375	1.55			1320		3.375	2.25	1.425	0.725
	1260		1.85	0.7875	0	7.3125			1350		5.8	4.1125	2.925	1.9375			1350		4.05	2.8125	1.9	1.0875
	1260	Z4 - Shed	1.85	0.7875	0	7.3125			1380		6.525	4.7	3.4125	2.325			1380		4.725	3.375	2.375	1.45
	1290		2.775	1.575	0.6875	0			1410	Z1 - Shed	7.25	5.2875	3.9	2.7125			1410		5.4	3.9375	2.85	1.8125
	1320		3.7	2.3625	1.375	0.5625			1440		0	5.875	4.3875	3.1			1440		6.075	4.5	3.325	2.175
	1350		4.625	3.15	2.0625	1.125			1440	Z2 - Shed	0	5.875	4.3875	3.1			1470		6.75	5.0625	3.8	2.5375
	1380		5.55	3.9375	2.75	1.6875			1470		0.725	0	4.875	3.4875			1500	Z1 - Shed	7.425	5.625	4.275	2.9
	1410	Z1 - Shed	6.475	4.725	3.4375	2.25			1500		1.45	0.5875	5.3625	3.875			1530		0	6.1875	4.75	3.2625
	1440		0	5.5125	4.125	2.8125			1530		2.175	1.175	5.85	4.2625			1530	Z2 - Shed	0	6.1875	4.75	3.2625
	1440	Z2 - Shed	0	5.5125	4.125	2.8125			1560		2.9	1.7625	6.3375	4.65			1560		0.675	0	5.225	3.625
	1470		0.925	0	4.8125	3.375			1590		3.625	2.35	6.825	5.0375			1590		1.35	0.5625	5.7	3.9875
	1500		1.85	0.7875	5.5	3.9375			1620		4.35	2.9375	7.3125	5.425			1620		2.025	1.125	6.175	4.35
	1530		2.775	1.575	6.1875	4.5			1650		5.075	3.525	7.8	5.8125			1650		2.7	1.6875	6.65	4.7125
	1560		3.7	2.3625	6.875	5.0625			1680	Z1 - Shed	5.8	4.1125	8.2875	6.2			1680		3.375	2.25	7.125	5.075
	1590	Z1 - Shed	4.625	3.15	7.5625	5.625			1710		0	4.7	8.775	6.5875			1710		4.05	2.8125	7.6	5.4375
	1620		0	3.9375	8.25	6.1875			1710	Z2 - Shed	0	4.7	8.775	6.5875			1740		4.725	3.375	8.075	5.8
	1620	Z2 - Shed	0	3.9375	8.25	6.1875			1740		0	0	9.2625	6.975			1770	Z1 - Shed	5.4	3.9375	8.55	6.1625
	1650		0	0	8.9375	6.75			1740	Z3 - Shed	0	0	9.2625	6.975			1800		0	4.5	9.025	6.525
	1650	Z3 - Shed	0	0	8.9375	6.75			1770		0	0	0	7.3625			1800	Z2 - Shed	0	4.5	9.025	6.525
	1680		0	0	0	7.3125			1770	Z4 - Shed	0	0	0	7.3625			1830		0	0	9.5	6.8875
	1680	Z4 - Shed	0	0	0	7.3125			1800		0	0	0	0			1830	Z3 - Shed	0	0	9.5	6.8875
	1710		0	0	0	0											1860		0	0	0	7.25
																	1860	Z4 - Shed	0	0	0	7.25
																	1890		0	0	0	0

## Sheet: Sheet1
			1990	2.4
			1991	2.7
			1992	3
			1993	3.1
			1994	3.8
			1995	4.9
			1996	6
			1997	7
			1998	9.7
			1999	13
			2000	17.5
			2001	24.3
			2002	31.1
			2003	39.2
			2004	47.5
			2005	59.1
			2006	74
			2007	93.8
			2008	121
			2009	158.5
			2010	199.9
			2011	243.9
			2012	292
			2013	346.5
			2014	409
			2015	425
			2016
