# Supplementary material for: Design procedures and experimental verification of an electro-thermal deicing system for wind turbines
Source: Copernicus journal article supplement (doi:10.5194/wes-6-1291-2021), 2021-10-06
Supplement: Supplementary file 1 [file wes-6-1291-2021-supplement.zip]

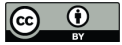

## *Supplement of*

# **Design procedures and experimental verification of an electro-thermal deicing system for wind turbines**

**David Getz and Jose Palacios**

*Correspondence to:* David Getz ([davidgetz0321@gmail.com](mailto:davidgetz0321@gmail.com)) and Jose Palacios ([jpg324@psu.edu](mailto:jpg324@psu.edu))

- [wes-6-1291-2021-supplement-title-page.pdf](#)
- Thesis Exp Data
  - Deicing Proposal\_06-23-19\_Phase 1.xlsx
  - Phase III Test Matrix.xlsx
  - Phase IV Test Matrix.xlsx
  - Test Matrix Overview\_07-19-19\_Phase 2.xlsx

The copyright of individual parts of the supplement might differ from the article licence.
