# Supplementary material for: Design procedures and experimental verification of an electro-thermal deicing system for wind turbines
Source: Copernicus journal article supplement (doi:10.5194/wes-6-1291-2021), 2021-10-06
Supplement: Supplementary file 2 [file Phase III Test Matrix.xlsx]

## Sheet: May 2019 Testing
May 2019 Testing
	Strip Heater				Aux Heaters
	Bus bar spacing	3.25	in		Bus bar spacing	6	in
	Width	12.125	in		Width	12.125	in
	Area	39.4062	in2		Area	72.75	in2
	Area	254.233	cm2		Area	469.354	cm2
	R	26.8041	ohm		R	49.4845	ohm
	Max Variac (VAC)	120	V		Max Variac (VAC)	120	V
	Max Power	537.231	W		Max Power	291	W
	Max Power Density	2.11314	W/cm2		Max Power Density	0.620001	W/cm2
	Current	4.47692	Amp		Current	4.85	Amp	Current doubles because the two aux heaters are wired in parallel
	THEORETICAL				EXPERIMENTAL			R_Strip	30	ohm
	Power Density Ranges				Power Density Ranges			R_Aux	54	ohm
	Variac Voltage (VAC)	Strip Heater PD (W/cm2)	Aux Heater PD (W/cm2)		Variac Voltage (VAC)	Strip Heater PD (W/cm2)	Aux Heater PD (W/cm2)
	0	0	0		0	0	0
	10	0.0146746	0.00430556		10	0.0131113	0.00394553
	20	0.0586983	0.0172223		20	0.0524453	0.0157821
	30	0.132071	0.0387501		30	0.118002	0.0355098
	40	0.234793	0.068889		40	0.209781	0.0631285
	50	0.366865	0.107639		50	0.327783	0.0986384
	60	0.528285	0.155		60	0.472007	0.142039
	70	0.719055	0.210973		70	0.642454	0.193331
	80	0.939173	0.275556		80	0.839124	0.252514
	90	1.18864	0.348751		90	1.06202	0.319588
	100	1.46746	0.430556		100	1.31113	0.394553
	110	1.77562	0.520973		110	1.58647	0.47741
	120	2.11314	0.620001		120	1.88803	0.568157
	50.5	0.374239	0.109803		50.2	0.33041	0.099429
	50	0.366865	0.107639		50.8	0.338356	0.10182

## Sheet: Phase II Test Matrix
	Phase 2 - May 2019 Testing
	Icing Conditions - MEDIUM
	Test ID	Test Type	Blade	Heater	Variac (VAC)	RMS Current (A)	Heater Resistance (ohms)	Power (Watts)	Theoretical Power Density (W/cm^2)	Measured Power Density (W/cm^2)	Power Density Labview (W/cm^2)	LWC (g/m^3)	Temp (C)	MVD (microns)	Test RPM	Time of Test (mins)	Anti-Iced (Yes or No)	Ice Thickness (mm)
Thurs 5/9/19	Test Case 0	BASELINE NO HEAT	White	Strip	0	0	0	0	0.334	0	0	0.4	-5	20	400	5	Baseline (N/A)	5
				Auxillary Suction	0	0	0	0	0.099	0	0							1
				Auxillary Pressure					0.099									1
			Blue	Strip	0	0	0	0	0.334	0	0							5
				Auxillary Suction	0	0	0	0	0.099	0	0							1
				Auxillary Pressure					0.099									1
		Anti-Icing	White	Strip	50.5	1.559	32.3926	78.7295	0.334	0.309674	N/A	0.4	-5	20	400	5	Yes	No ice at LE. Ice present at overlap. Peak = 8mm, 2mm low. Further back = 3mm	Heard 3-4 ice sheds. Jose believes ice was forming and shedding on both blades
				Auxillary Suction	50	1.793	27.8862	89.65	0.099	0.0955036	N/A						No
				Auxillary Pressure					0.099								No
			Blue	Strip	50.9	1.7921	28.4024	91.2179	0.334	0.358796	N/A						Yes
				Auxillary Suction	49.9	1.596	31.2657	79.6404	0.099	0.0848405	N/A						No
				Auxillary Pressure					0.099								No
	Test Case 1	BASELINE NO HEAT	White	Strip	0	0	0	0		0	N/A	0.4	-5	20	400	5	Baseline (N/A)	5.5
				Auxillary Suction	0	0	0	0		0	N/A							1.5
				Auxillary Pressure														0.5
			Blue	Strip	0	0	0	0		0	N/A							5.5
				Auxillary Suction	0	0	0	0		0	N/A							1.5
				Auxillary Pressure														1.5
		Anti-Icing	White	Strip	50.5	1.56	32.3718	78.78	0.334	0.309873	N/A	0.4	-5	20	400	5	No	5	Power remained same on LE as Test Case 0, but icing occurred (??)
				Auxillary Suction	70	2.45	28.5714	171.5	0.193	0.182698	N/A						No	3.5	Jose believes ice accreted slower and did not shed
				Auxillary Pressure					0.193								No	3.5
			Blue	Strip	50.9	1.7	29.9412	86.53	0.34	0.340357	N/A						No	5
				Auxillary Suction	70	2.19	31.9635	153.3	0.193	0.16331	N/A						No	3.5
				Auxillary Pressure					0.193								No	3.5
Fri 5/10/19	Test Case 2	BASELINE NO HEAT	White	Strip	0	0	0	0		0	N/A	0.4	-8	20	400	5	Baseline (N/A)	7.5-9.5
				Auxillary Suction	0	0	0	0		0	N/A							2-2.5
				Auxillary Pressure
			Blue	Strip	0	0	0	0		0	N/A
				Auxillary Suction	0	0	0	0		0	N/A
				Auxillary Pressure
		Anti-Icing	White	Strip	50.5	1.56	32.3718	78.78	0.334	0.309873	N/A	0.4	-8	20	400	5	No		Partial ice shed on both blades
				Auxillary Suction	50	2.42	20.6612	121	0.099	0.257801	N/A						No		Stopped taking ice thickness measurements as it was too variable and not as value adding as Column R.
				Auxillary Pressure					0.099								No
			Blue	Strip	50.9	1.75	29.0857	89.075	0.34	0.350367	N/A						No
				Auxillary Suction	50	2.19	22.8311	109.5	0.099	0.11665	N/A						No
				Auxillary Pressure					0.099								No
	Test Case 3	Anti-Icing	White	Strip	50.5	1.56	32.3718	78.78	0.334	0.309873	0.3097	0.4	-8	20	400	5	No		Ran for 5 mins, stopping every minute to take photos.
				Auxillary Suction	50	1.6	31.25	80	0.099	0.0852235	0.09378						No		Ice builds up gradually
				Auxillary Pressure					0.099								No
			Blue	Strip	50.9	1.7	29.9412	86.53	0.34	0.340357	0.34						No
				Auxillary Suction	50	1.63	30.6748	81.5	0.099	0.0868215	0.08677						No
				Auxillary Pressure					0.099								No
	Test Case 4	Anti-Icing	White	Strip	60	1.84	32.6087	110.4	0.472	0.434247	0.4339	0.4	-8	20	400	3	Yes		White blade no ice on LE, Blue blade ice on LE.
				Auxillary Suction	50	1.79	27.933	89.5	0.099	0.0953438	0.0955						No		Aux heaters had light icing
				Auxillary Pressure					0.099								No
			Blue	Strip	60.3	2.02	29.8515	121.806	0.472	0.479111	0.48						No
				Auxillary Suction	50	1.63	30.6748	81.5	0.099	0.0868215	0.087						No
				Auxillary Pressure					0.099								No
	Test Case 5	Anti-Icing	White	Strip	60	1.89	31.746	113.4	0.472	0.446047	0.445	0.4	-8	20	400	3	Yes		Repeat of Test 4 to verify results
				Auxillary Suction	50	1.76	28.4091	88	0.099	0.0937459	0.096						No		White blade LE clean, even bus bar no ice
				Auxillary Pressure					0.099								No		Blue blade LE mostly ice, some areas toward back no ice
			Blue	Strip	60.3	2.02	29.8515	121.806	0.472	0.479111	0.48						No		Light icing on Aux heaters for both
				Auxillary Suction	50	1.66	30.1205	83	0.099	0.0884194	0.0855						No
				Auxillary Pressure					0.099								No
	Test Case 6	Anti-Icing	White	Strip	60	1.84	32.6087	110.4	0.472	0.434247	0.434	0.4	-8	20	400	3	Yes		Both blades LE clean, including bus bar
				Auxillary Suction	60.1	2.09	28.756	125.609	0.142	0.133811	0.1359						No		Light icing on back heater
				Auxillary Pressure					0.142								No
			Blue	Strip	60.3	2.02	29.8515	121.806	0.472	0.479111	0.48						Yes
				Auxillary Suction	60.5	1.89	32.0106	114.345	0.142	0.121811	0.122						No
				Auxillary Pressure					0.142								No
	Test Case 7	Anti-Icing	White	Strip	60	1.84	32.6087	110.4	0.472	0.434247	0.4339	0.4	-8	20	400	3	Yes		Repeat of Test 6 to verify results
				Auxillary Suction	60.1	2.12	28.3491	127.412	0.142	0.135731	0.1359						No		Both blades LE clean, including bus bar
				Auxillary Pressure					0.142								No		Light icing on back heater
			Blue	Strip	60.3	2.02	29.8515	121.806	0.472	0.479111	0.48						Yes
				Auxillary Suction	60.5	1.93	31.3472	116.765	0.142	0.124389	0.124						No
				Auxillary Pressure					0.142								No
	Test Case 8	Anti-Icing	White	Strip	50.2	1.51	33.245	75.802	0.33	0.298159	0.299	0.4	-8	20	400	3	No		Dropping LE PD's to see if ice is gripping onto Aux heaters and make it look like they are iced like in previous cases
				Auxillary Suction	60.1	2.12	28.3491	127.412	0.142	0.135731	0.136						No		Blue blade no ice at LE, white blade iced. Shedding?
				Auxillary Pressure					0.142								No		Light icing on both blade Aux heaters
			Blue	Strip	50.8	1.7	29.8824	86.36	0.338	0.339688	0.339						Yes
				Auxillary Suction	60.5	1.89	32.0106	114.345	0.142	0.121811	0.122						No
				Auxillary Pressure					0.142								No
	Test Case 9	Anti-Icing	White	Strip	50.2	1.56	32.1795	78.312	0.33	0.308032	0.3079	0.4	-8	20	400	3	No		Repeat of Test 8 to verify results
				Auxillary Suction	60.1	2.09	28.756	125.609	0.142	0.133811	0.138						No		Blue blade no ice at LE, white blade no ice on inside of blade at LE, but ice at outside of blade. Right on verge?
				Auxillary Pressure					0.142								No		Light icing on both blade Aux heaters
			Blue	Strip	50.8	1.7	29.8824	86.36	0.338	0.339688	0.339						Yes
				Auxillary Suction	60.5	1.89	32.0106	114.345	0.142	0.121811	0.122						No
				Auxillary Pressure					0.142								No
	Test Case 10	Anti-Icing	White	Strip	52.4	1.61	32.5466	84.364		0.331837	0.331	0.4	-8	20	400	3	No		Bumped up White LE to match Blue Blade. Preset all voltages to try and match.
				Auxillary Suction	58.4	2.06	28.3495	120.304		0.128159	0.128						No		Blue blade LE appears no ice, slight ice on white blade at LE
				Auxillary Pressure													No		Light ice on back of blade
			Blue	Strip	50.6	1.7	29.7647	86.02		0.338351	0.338						Yes
				Auxillary Suction	60.2	1.89	31.8519	113.778		0.121207	0.121						No
				Auxillary Pressure													No
	Test Case 11	Anti-Icing	White	Strip	52.4	1.65	31.7576	86.46		0.340081	0.34	0.4	-8	20	400	3	Yes		Leaving strip heaters at the same PD as Test 10, bumped up Aux heaters to see if they influence LE heaters
				Auxillary Suction	69	2.45	28.1633	169.05		0.180088	0.18						No		Both blades at LE no ice. Light ice at Aux heaters
				Auxillary Pressure													No
			Blue	Strip	50.6	1.7	29.7647	86.02		0.338351	0.338						Yes
				Auxillary Suction	73	2.35	31.0638	171.55		0.182751	0.183						No
				Auxillary Pressure													No
	Test Case 12	Anti-Icing	White	Strip	52.4	1.65	31.7576	86.46		0.340081	0.341	0.4	-8	20	400	3	Yes		Repeating Test 11 to verify results. Let chamber and blades cool down to equilibrium. Adjusting heaters before Test 11 to correct temp may have warmed blades too much
				Auxillary Suction	69	2.45	28.1633	169.05		0.180088	0.18						No		Both blades clean on LE
				Auxillary Pressure													No		Noticed temperature on Blue LE was getting high. Turned heater off but still got temperature rise. There may be a short?
			Blue	Strip	50.6	1.75	28.9143	88.55		0.348302	0.347						Yes
				Auxillary Suction	73	2.35	31.0638	171.55		0.182751	0.183						No
				Auxillary Pressure													No
	Test Case 13	Anti-Icing	White	Strip	52.4	1.61	32.5466	84.364		0.331837	0.331	0.4	-7	20	400	3	No		Turned back heaters off, leaving LE heaters on to see if ice forms and if Aux heaters definitely influence ice formation.
				Auxillary Suction	0	0	0	0		0	0						No		White LE partially no ice, Blue LE iced up. Bus bars on White LE iced up.
				Auxillary Pressure													No
			Blue	Strip	51	1.7	30	86.7		0.341025	0.34						No
				Auxillary Suction	0	0	0	0		0	0						No
				Auxillary Pressure													No
	Icing Conditions - SEVERE
Mon 06/17/19	Test ID	Test Type	Blade	Heater	Variac (VAC)	RMS Current (A)	Heater Resistance (ohms)	Power (Watts)		Measured Power Density (W/cm^2)	Power Density Labview (W/cm^2)	LWC (g/m^3)	Temp (C)	MVD (microns)	Test RPM	Time of Test (mins)	Anti-Iced (Yes or No)	Ice Thickness (mm)
	Test Case 14	Baseline	White	Strip	0	0	0	0	0.334	0	0	0.9	-8	35	400	5	Baseline (N/A)	11
				Auxillary Suction	0	0	0	0	0.099	0	0							3
				Auxillary Pressure	0	0	0	0	0.099	0	0							3
			Blue	Strip	0	0	0	0	0.334	0	0							11
				Auxillary Suction	0	0	0	0	0.099	0	0							3
				Auxillary Pressure	0	0	0	0	0.099	0	0							3
	Test Case 15	Baseline	White	Strip	0	0	0	0		0	0	0.9	-8	35	400	5	Baseline (N/A)	11.5
				Auxillary Suction	0	0	0	0		0	0							3
				Auxillary Pressure	0	0	0	0		0	0							3
			Blue	Strip	0	0	0	0		0	0							11.5
				Auxillary Suction	0	0	0	0		0	0							3
				Auxillary Pressure	0	0	0	0		0	0							3
	Test Case 16	Anti-Icing	White	Strip	50.5	1.47	34.3537	74.235		0.291996	0.291	0.9	-8	35	400	3	No	8
				Auxillary Suction	50	1.76	28.4091	88		0.0937459	0.09378						No	2
				Auxillary Pressure	50												No	2
			Blue	Strip	50.5	1.51	33.4437	76.255		0.299941	0.3						No	8
				Auxillary Suction	50	1.79	27.933	89.5		0.0953438	0.0955						No	2
				Auxillary Pressure	50												No	2
	Test Case 17	Anti-Icing	White	Strip	60.6	1.79	33.8547	108.474		0.426671	0.427	0.9	-8	35	400	3	Yes	0
				Auxillary Suction	60	2.09	28.7081	125.4		0.133588	0.1335						No	2
				Auxillary Pressure	60												No	2
			Blue	Strip	60.8	1.79	33.9665	108.832		0.428079	0.428						Yes	0
				Auxillary Suction	60	2.09	28.7081	125.4		0.133588	0.1335						No	2
				Auxillary Pressure	60												No	2
	Test Case 18	Anti-Icing	White	Strip	60.6	1.79	33.8547	108.474		0.426671	0.427	0.9	-8	35	400	3	Yes	0
				Auxillary Suction	70.2	2.45	28.6531	171.99		0.18322	0.183						No	2
				Auxillary Pressure	70.2												No	2
			Blue	Strip	60.8	1.79	33.9665	108.832		0.428079	0.428						Yes	0
				Auxillary Suction	70.3	2.42	29.0496	170.126		0.181234	0.181						No	2
				Auxillary Pressure	70.3												No	2
	Test ID	Test Type	Blade	Heater	Variac (VAC)	RMS Current (A)	Heater Resistance (ohms)	Power (Watts)		Power Density (W/cm^2)	Power Density Labview (W/cm^2)	LWC (g/m^3)	Temp (C)	MVD (microns)	Test RPM	Time of Test (mins)	Anti-Iced (Yes or No)	Ice Thickness (mm) / Melting Time (s)
	Test Case 19	Anti-Icing	White	Strip	70	2.02	34.6535	141.4	0.334	0.556182	0.557	0.9	-8	35	400	3	Yes	0
				Auxillary Suction	70.2	2.45	28.6531	171.99	0.099	0.18322	0.183						No	1.5
				Auxillary Pressure	70.2				0.099								No	1.5
			Blue	Strip	70.2	2.07	33.913	145.314	0.334	0.571577	0.571						Yes	0
				Auxillary Suction	70.3	2.45	28.6939	172.235	0.099	0.183481	0.181						No	1.5
				Auxillary Pressure	70.3				0.099								No	1.5
Tues 06/18/19	Test Case 20	Anti-Icing	White	Strip	60	1.79	33.5196	107.4		0.422447	0.423	0.9	-8	35	400	3	Yes	0
				Auxillary Suction	80.1	2.75	29.1273	220.275		0.234658	0.234						No	1	White Aux was ice free on the inner half of the span
				Auxillary Pressure	80.1												No	1
			Blue	Strip	60.2	1.79	33.6313	107.758		0.423855	0.424						Yes	0
				Auxillary Suction	80.1	2.78	28.8129	222.678		0.237218	0.237						No	1	Blue Aux was not ice free anywhere on the aux heater
				Auxillary Pressure	80.1												No	1
	Test Case 21	Anti-Icing	White	Strip	60	1.75	34.2857	105		0.413006	0.412	0.9	-8	35	400	3	Yes	0
				Auxillary Suction	100.2	3.47	28.8761	347.694		0.370396	0.371						Yes	0.1	White aux looked ice free along the span of the heater. But there is an 8mm wall building on the overlap
				Auxillary Pressure	100.2												Yes	0.1
			Blue	Strip	60.2	1.79	33.6313	107.758		0.423855	0.424						Yes	0
				Auxillary Suction	100.2	3.57	28.0672	357.714		0.381071	0.381						Yes	0.1	Blue aux looked ice free along the span of the heater. But there is an 8mm wall building on the overlap
				Auxillary Pressure	100.2												Yes	0.1
	Test Case 22	Anti-Icing	White	Strip	70.5	2.07	34.058	145.935		0.57402	0.574	0.9	-8	35	400	3	Yes	0
				Auxillary Suction	100.2	3.47	28.8761	347.694		0.370396	0.371						Yes	0	White aux was completely ice free!
				Auxillary Pressure	100.2												Yes	0
			Blue	Strip	70.5	2.12	33.2547	149.46		0.587885	0.587						Yes	0
				Auxillary Suction	100.2	3.5	28.6286	350.7		0.373599	0.374						Yes	0	Blue aux had a mini wall on the bottom of the airfoil. Other than that; this test is the most succesfull anti-ice case
				Auxillary Pressure	100.2												Yes	0	Take a look at the photos
	Test Case 23	Anti-Icing	White	Strip	70.4	2.12	33.2075	149.248		0.587051	0.586	0.9	-8	35	400	5	Yes	0
				Auxillary Suction	100.2	3.47	28.8761	347.694		0.370396	0.371						Yes	0
				Auxillary Pressure	100.2												Yes	0
			Blue	Strip	70.2	2.07	33.913	145.314		0.571577	0.572						Yes	0
				Auxillary Suction	100.2	3.54	28.3051	354.708		0.377868	0.378						Yes	0	Blue aux has a couple small bumps on the underside of the airfoil again. I think the sealer glue may be promoting this ice adhesion
				Auxillary Pressure	100.2												Yes	0	Take a look at the photos
	Test Case 24	Anti-Icing	White	Strip	70.4	2.07	34.0097	145.728		0.573206	0.574	0.9	-8	35	400	10	Yes	0	White strip had some ice on the inside edge, but I think the bump from the thermistor highly assists this ice accretion
				Auxillary Suction	100.2	3.44	29.1279	344.688		0.367194	0.367						Yes	0	Take a look at the photos
				Auxillary Pressure	100.2												Yes	0
			Blue	Strip	70.2	2.12	33.1132	148.824		0.585383	0.585						Yes	0	Blue strip had some ice on the inside edge, but I think the bump from the thermistor highly assists this ice accretion
				Auxillary Suction	100.2	3.5	28.6286	350.7		0.373599	0.374						Yes	0	Blue aux developed a small ice wall again; maybe sealer underneath assisted. The temps for W1 and W3 (strip) were hotter than everything else and I think they may have helped the white blade not accrete the ice wall.
				Auxillary Pressure	100.2												Yes	0	Take a look at the photos
Thurs 06/27/19 & Fri 06/28/19	Test Case 25 (Re-Do 12)	Anti-Icing	White	Strip	52.4	1.51	34.702	79.124		0.311226	0.0312	0.4	-8	20	400	3	No	2.5
				Auxillary	0	0	0	0		0	0						No	0.5
			Blue	Strip	50.6	1.51	33.5099	76.406		0.300535	0.301						No	2.5
				Auxillary	0	0	0	0		0	0						No	0.5
	Test Case 26 (Re-Do 17)	Anti-Icing	White	Strip	60.8	1.75	34.7429	106.4		0.418513	0.417	0.4	-8	20	400	3	No	~2	developing a small ice wall where the heaters overlap. It's on the verge of being anti-iced on the LE
	Test Case 27 (Re-Do 17)			Auxillary	0	0	0	0		0	0						No	0.5
			Blue	Strip	60.6	1.79	33.8547	108.474		0.426671	0.427						No	~2
				Auxillary	0	0	0	0		0	0						No	0.5
	Test Case 27	Melting Test	White	Strip	52	1.51	34.4371	78.52		0.30885	0.309	0.4	-8	20	400	3		330	approximately 5mm of ice
	Test Case 27 (Re-Do 17)			Auxillary	52	1.79	29.0503	93.08		0.0991576	0.099							120
			Blue	Strip	52	1.56	33.3333	81.12		0.319077	0.318							300	ice on blue actually slid off at 300 seconds. The white blade never had ice "slide off".
				Auxillary	52	1.83	28.4153	95.16		0.101373	0.101							120
	Test Case 28	Melting Test	White	Strip	52	1.56	33.3333	81.12		0.319077	0.319	0.4	-8	20	400	5		240	approximately 7mm of ice
	Test Case 27 (Re-Do 17)			Auxillary	52	1.79	29.0503	93.08		0.0991576	0.0993							230
			Blue	Strip	52	1.56	33.3333	81.12		0.319077	0.319							280	For both blades, I hardly touched the outside edge of the ice shape, and it fell off. Next test I will remove ice from edges with hot plate
				Auxillary	52	1.83	28.4153	95.16		0.101373	0.101							230
	Test Case 29	Melting Test	White	Strip	52	1.56	33.3333	81.12		0.319077	0.319	0.4	-8	20	400	5		220	approximately 7mm of ice
	Test Case 27 (Re-Do 17)			Auxillary	52	1.83	28.4153	95.16		0.101373	0.101							230
			Blue	Strip	52	1.56	33.3333	81.12		0.319077	0.319							220	Ice fell off appropriately.
				Auxillary	52	1.83	28.4153	95.16		0.101373	0.101							230
	Test Case 30 (Re-Do 17)	Melting Test	White	Strip	52	1.56	33.3333	81.12		0.319077	0.319	0.4	-8	20	400	10		250	approximately 11.5mm of ice
	Test Case 27 (Re-Do 17)			Auxillary	52	1.83	28.4153	95.16		0.101373	0.101							330
			Blue	Strip	52	1.56	33.3333	81.12		0.319077	0.319							260	The aux heaters have trouble completely "melting" ice. Both strip heaters had the ice fall off successfully.
				Auxillary	52	1.83	28.4153	95.16		0.101373	0.101							330
Mon 07/01/19	Test Case 31 (Re-Do 17)	Anti-Icing	White	Strip	60.8	1.79	33.9665	108.832		0.428079	0.429	0.9	-8	35	400	3	No	6	Approx 6mm ice wall where the heaters overlap. 7mm towards the tip of the blade. About 1mm on the aux heaters
	Test Case 27 (Re-Do 17)			Auxillary	0	0	0	0		0	0						No	1
			Blue	Strip	60.8	1.84	33.0435	111.872		0.440037	0.439						No	6	please look at photos
				Auxillary	0	0	0	0		0	0						No	1
	Test Case 32	Melting Test	White	Strip	52.1	1.51	34.5033	78.671		0.309444	0.31	0.9	-8	35	400	3		250	approx 8mm on tip of blade and 5mm on "root side" of test section.
	Test Case 27 (Re-Do 17)			Auxillary	52	1.79	29.0503	93.08		0.0991576	0.099							260
			Blue	Strip	52.3	1.56	33.5256	81.588		0.320918	0.32							300	As before, the aux heaters had everything melted around 250 secs. The water doesn't "run off" because of the shallow slope at the aux heaters
				Auxillary	52	1.79	29.0503	93.08		0.0991576	0.099							260
	Test Case 33	Melting Test	White	Strip	52	1.51	34.4371	78.52		0.30885	0.31	0.9	-8	35	400	10		160	sorry I forgot to measure the thickness of ice…..based on the picture it was approx 20-30 mm of ice
	Test Case 27 (Re-Do 17)			Auxillary	52	1.83	28.4153	95.16		0.101373	0.101							180
			Blue	Strip	52	1.56	33.3333	81.12		0.319077	0.32							150	At 180s the Aux heaters melted the ice interface, but it would take quite awhile for the ice chunks to melt completely to water.
				Auxillary	52	1.83	28.4153	95.16		0.101373	0.101							180

## Sheet: Phase III Test Matrix
	Phase III - September 2019 Testing
	Icing Conditions - MEDIUM
	Test ID	Test Type	Blade	Heater	Variac (VAC)	RMS Current (A)	Heater Resistance (ohms)	Power (Watts)	Theoretical Power Density (W/cm^2)	Measured Power Density (W/cm^2)	Power Density Labview (W/cm^2)	LWC (g/m^3)	Temp (C)	MVD (microns)	Test RPM	Time of Test (mins)	Anti-Iced (Yes or No)	Ice Thickness (mm)
2019-09-16	Test Case 0	BASELINE NO HEAT	White	Strip	0	0	0	0		0	N/A	0.4	-8	20	400	3	Baseline (N/A)	~2.5
				Auxillary Suction	0	0	0	0		0	N/A
				Auxillary Pressure
			Blue	Strip	0	0	0	0		0	N/A							~2.5
				Auxillary Suction	0	0	0	0		0	N/A
				Auxillary Pressure
	Test Case 1	Anti-Icing	White	Strip	50.4		#DIV/0!	0	0.334	0	0.3282	0.4	-8	20	400	3	N		Did not capture currents for this test
				Auxillary Suction	50.4		#DIV/0!	0	0.099	0	0.096						N
				Auxillary Pressure					0.099								N
			Blue	Strip	50.2		#DIV/0!	0	0.34	0	0.326						N
				Auxillary Suction	50.5		#DIV/0!	0	0.099	0	0.0982						N
				Auxillary Pressure					0.099								N
	Test Case 2	Anti-Icing with 1 min Delay	White	Strip	50.4	1.61	31.3043	81.144	0.334	0.319171	0.3189	0.4	-8	20	400	4	N		Run cloud for 1 min, then heaters on for 3 mins
				Auxillary Suction	50.4	1.79	28.1564	90.216	0.099	0.0961066	0.0962						N		Icing much more severe.
				Auxillary Pressure					0.099								N
			Blue	Strip	50.2	1.61	31.1801	80.822	0.34	0.317905	0.317						N
				Auxillary Suction	50.5	1.86	27.1505	93.93	0.099	0.100063	0.1						N
				Auxillary Pressure					0.099								N
	Test Case 3	Anti-Icing with 1 min Delay	White	Strip	50.4	1.66	30.3614	83.664	0.472	0.329083	0.3282	0.4	-8	20	400	6	N		Run cloud for 1 min, then heaters on for 5 mins
				Auxillary Suction	50.4	1.83	27.541	92.232	0.099	0.0982542	0.098						N		Blue B3 thermocouple appears reading incorrectly
				Auxillary Pressure					0.099								N		Icing still severe. Ice is more uniform than Test Case 2
			Blue	Strip	50.2	1.61	31.1801	80.822	0.472	0.317905	0.317						N
				Auxillary Suction	50.5	1.83	27.5956	92.415	0.099	0.0984492	0.098						N
				Auxillary Pressure					0.099								N
	Test Case 4	Anti-Icing	White	Strip	53	1.702	31.1398	90.206	0.472	0.354816	0.354	0.4	-8	20	400	3	N		No delay, run heaters for 3 mins.
				Auxillary Suction	50.4	1.83	27.541	92.232	0.099	0.0982542	0.098						N		Increased PD for strip heaters. Left Aux heaters the same
				Auxillary Pressure					0.099								N		Ice formation where two LE heaters meet. Odd ice shapes forming
			Blue	Strip	53	1.699	31.1948	90.047	0.472	0.35419	0.354						N
				Auxillary Suction	50.5	1.89	26.7196	95.445	0.099	0.101677	0.101						N
				Auxillary Pressure					0.099								N
	Test Case 5	Anti-Icing	White	Strip	56	1.79	31.2849	100.24	0.472	0.394283	0.395	0.4	-8	20	400	3	Y		No delay, run heaters for 3 mins
				Auxillary Suction	50.4	1.83	27.541	92.232	0.142	0.0982542	0.098						N		Strip heaters anti-iced except where heaters meet.
				Auxillary Pressure					0.142								N		Ice still present on Aux heaters
			Blue	Strip	56	1.79	31.2849	100.24	0.472	0.394283	0.394						Y
				Auxillary Suction	50.5	1.85	27.2973	93.425	0.142	0.0995251	0.1						N
				Auxillary Pressure					0.142								N
	Test Case 6	Anti-Icing	White	Strip	60.4	1.93	31.2953	116.572	0.472	0.458524	0.459	0.4	-8	20	400	3	Y		No delay, run heaters for 3 mins. Trying to remove line of ice at LE
				Auxillary Suction	50.4	1.83	27.541	92.232	0.142	0.0982542	0.098						N		Ice line at LE heaters still present, but better than previous test
				Auxillary Pressure					0.142								N
			Blue	Strip	60.4	1.93	31.2953	116.572	0.472	0.458524	0.458						Y
				Auxillary Suction	50.5	1.86	27.1505	93.93	0.142	0.100063	0.1						N
				Auxillary Pressure					0.142								N
	Test Case 7	Anti-Icing	White	Strip	60.4	1.93	31.2953	116.572	0.472	0.458524	0.459	0.4	-8	20	400	3	Y		No delay, run heaters for 3 mins
				Auxillary Suction	0	0	0	0	0.142	0	0						N		Aux heaters off. Trying to understand what effect they may have.
				Auxillary Pressure					0.142								N		Ice at LE no change. More ice formation where LE and Aux heaters overlap
			Blue	Strip	60.4	1.86	32.4731	112.344	0.472	0.441893	0.447						Y
				Auxillary Suction	0	0	0	0	0.142	0	0						N
				Auxillary Pressure					0.142								N
	Test Case 8	Anti-Icing	White	Strip	56.2	1.79	31.3966	100.598	0.472	0.395692	0.396	0.4	-8	20	400	3	Y		No delay, run heaters for 3 mins
				Auxillary Suction	56	1.99	28.1407	111.44	0.142	0.118716	0.118						N		Drop LE PD down to 0.4 W/cm2. Bump up Aux PD to get true anti-ice case
				Auxillary Pressure					0.142								N		Anit-iced at LE except where heaters meet. Very light icing on Aux
			Blue	Strip	55.7	1.79	31.1173	99.703	0.472	0.392171	0.392						Y
				Auxillary Suction	56	2.05	27.3171	114.8	0.142	0.122296	0.122						N
				Auxillary Pressure					0.142								N
	Test Case 9	Anti-Icing	White	Strip	51	1.66	30.7229	84.66	0.472	0.333001	0.332	0.4	-8	20	400	3	Y		No delay, run heaters for 3 mins
				Auxillary Suction	56	1.99	28.1407	111.44	0.142	0.118716	0.1187						N		Drop LE PD down to current system values.
				Auxillary Pressure					0.142								N		Aux heaters same as Test Case 8 (slightly higher than actual system)
			Blue	Strip	51	1.61	31.677	82.11	0.472	0.322971	0.322						Y		LE heaters are mostly ice free except where heaters meet.
				Auxillary Suction	56	2.02	27.7228	113.12	0.142	0.120506	0.1207						N		Light icing at Aux
				Auxillary Pressure					0.142								N
2019-09-17	Test Case 10	Anti-Icing	White	Strip	50.4	1.66	30.3614	83.664	0.33	0.329083	0.326	0.4	-8	20	400	10	N		No delay, run heaters for 10 mins.
				Auxillary Suction	50.4	1.83	27.541	92.232	0.142	0.0982542	0.0976						N		Same conditions as Test #9. Severe ice formation at the LE
				Auxillary Pressure					0.142								N		Need to bump up the PD's and look for min PD required to anti-ice.
			Blue	Strip	50.2	1.61	31.1801	80.822	0.338	0.317905	0.317						N
				Auxillary Suction	50.5	1.83	27.5956	92.415	0.142	0.0984492	0.0976						N
				Auxillary Pressure					0.142								N
	Test Case 11	Anti-Icing	White	Strip	60.2	1.98	30.404	119.196	0.33	0.468845	0.469	0.4	-8	20	400	10	Y		No delay, run heaters for 10 mins
				Auxillary Suction	60	2.16	27.7778	129.6	0.142	0.138062	0.138						N		Anti-iced at LE except at where the heaters meet. Considered successful test.
				Auxillary Pressure					0.142								N
			Blue	Strip	60.3	1.89	31.9048	113.967	0.338	0.448277	0.447						Y
				Auxillary Suction	60.1	2.19	27.4429	131.619	0.142	0.140213	0.14						N
				Auxillary Pressure					0.142								N
	Test Case 12	Anti-Icing	White	Strip	55.6	1.8	30.8889	100.08		0.393654	0.3926	0.4	-8	20	400	10	N		No delay, run heaters for 10 mins
				Auxillary Suction	55.5	2.02	27.4752	112.11		0.11943	0.1196						N		Blades somewhat clear of ice, but interface between LE and Aux is not clean
				Auxillary Pressure													N		Next test to bump up the PD's
			Blue	Strip	55.4	1.75	31.6571	96.95		0.381343	0.38						N
				Auxillary Suction	55.6	2.02	27.5248	112.312		0.119645	0.1198						N
				Auxillary Pressure													N
	Test Case 13	Anti-Icing	White	Strip	57.5	1.84	31.25	105.8		0.416153	0.416	0.4	-8	20	400	10	N		No delay, run heaters for 10 mins
				Auxillary Suction	57.5	2.09	27.512	120.175		0.128022	0.128						N		Similar to previous test case. Not considered anti-iced.
				Auxillary Pressure													N		Test Case #11 appears to be the minimum PD required for anti-icing.
			Blue	Strip	57.7	1.84	31.3587	106.168		0.417601	0.417						N		Next test will determine if line of ice at LE heater/heater interface can be melted.
				Auxillary Suction	57.5	2.12	27.1226	121.9		0.129859	0.13						N
				Auxillary Pressure													N
	Test Case 14	Anti-Icing	White	Strip	80.6	2.59	31.1197	208.754		0.821112	0.82	0.4	-8	20	400	10	Y		No delay, run for 10 mins
				Auxillary Suction	80.1	2.85	28.1053	228.285		0.243191	0.243						Y		Completely anti-iced. Considered a successful test
				Auxillary Pressure													Y		PD's are extremely high and not realistic, but test shows that removing ice line at LE heater/heater interface is possible.
			Blue	Strip	80.3	2.54	31.6142	203.962		0.802263	0.801						Y		W6 thermocouple signal is no longer working. Disregard readings
				Auxillary Suction	80.4	2.91	27.6289	233.964		0.24924	0.249						Y
				Auxillary Pressure													Y
	Test Case 15	Anti-Icing	White	Strip	70.6	2.26	31.2389	159.556		0.627597	0.627	0.4	-8	20	400	10	Y		No delay, run for 10 mins
				Auxillary Suction	70	2.48	28.2258	173.6		0.184935	0.185						Y		Runback water may be refreezing at Aux heater, but otherwise completely ice free
				Auxillary Pressure													Y
			Blue	Strip	70.5	2.21	31.9005	155.805		0.612842	0.613						Y
				Auxillary Suction	70.3	2.58	27.2481	181.374		0.193217	0.193						Y
				Auxillary Pressure													Y
	Test Case 16	BASELINE NO HEAT	White	Strip	0	0	0	0		0	0	0.4	-8	20	400	10	Baseline (N/A)	~9	Baseline test for 10 min run
				Auxillary Suction	0	0	0	0		0	0								Note that torque data comparison may not be totally accurate as the test stand is not cleaned the same every time
				Auxillary Pressure															One observation - ice stops forming about halfway up the Aux heater. Might be able to narrow size.
			Blue	Strip	0	0	0	0		0	0							~9	Ice stopping halfway up Aux heater might be due to ice forming at LE and pushing the moisture away from the blade.
				Auxillary Suction	0	0	0	0		0	0
				Auxillary Pressure
	Icing Conditions - SEVERE
2019-09-17	Test ID	Test Type	Blade	Heater	Variac (VAC)	RMS Current (A)	Heater Resistance (ohms)	Power (Watts)		Measured Power Density (W/cm^2)	Power Density Labview (W/cm^2)	LWC (g/m^3)	Temp (C)	MVD (microns)	Test RPM	Time of Test (mins)	Anti-Iced (Yes or No)	Ice Thickness (mm)
	Test Case 17	BASELINE NO HEAT	White	Strip	0	0	0	0	0.334	0	0	0.9	-8	35	400	10	Baseline (N/A)	~14	Baseline test for 10 min run
				Auxillary Suction	0	0	0	0	0.099	0	0								Note that torque data comparison may not be totally accurate as the test stand is not cleaned the same every time
				Auxillary Pressure	0	0	0	0	0.099	0	0								Significant ice formation. Disregard comments of ice formation on aux heaters in Test #16. Majority of aux heater has ice
			Blue	Strip	0	0	0	0	0.334	0	0							~14	Wires on white blade came loose. Lost three thermistors.
				Auxillary Suction	0	0	0	0	0.099	0	0
				Auxillary Pressure	0	0	0	0	0.099	0	0
	Test Case 18	Anti-Icing	White	Strip	50.1	1.61	31.118	80.661	0.334	0.317271	0.317	0.9	-8	35	400	10	N		No delay, run for 10 mins
				Auxillary Suction	50.2	1.79	28.0447	89.858	0.099	0.0957252	0.096						N		Observe what icing looks like for current system PD's
				Auxillary Pressure					0.099								N		Multiple ice sheds occurred, two of which very large.
			Blue	Strip	50.1	1.61	31.118	80.661	0.34	0.317271	0.316						N		LE has areas of no ice, but other areas have severe ice. Maybe ice sheds are reason for clean areas on blade?
				Auxillary Suction	50.2	1.83	27.4317	91.866	0.099	0.0978643	0.097						N
				Auxillary Pressure					0.099								N
	Test Case 19	Anti-Icing	White	Strip	60.1	1.93	31.1399	115.993	0.334	0.456246	0.457	0.9	-8	35	400	3	N		No delay, run for 3 mins
				Auxillary Suction	60.6	2.16	28.0556	130.896	0.099	0.139443	0.139						N		LE looked much cleaner than expected. Very small ice formation where LE heaters meet
				Auxillary Pressure					0.099								N		Re-run test for 10 mins to make comparison to medium ice condition
			Blue	Strip	60.2	1.93	31.1917	116.186	0.34	0.457005	0.457						N
				Auxillary Suction	60.1	2.19	27.4429	131.619	0.099	0.140213	0.14						N
				Auxillary Pressure					0.099								N
	Test Case 20	Anti-Icing	White	Strip	60.1	1.98	30.3535	118.998	0.334	0.468066	0.47	0.9	-8	35	400	10	N		No delay, run for 10 mins
				Auxillary Suction	60.6	2.16	28.0556	130.896	0.099	0.139443	0.139						N		LE mostly clean. Transition from LE to Aux has severe ice. Large ice wall present.
				Auxillary Pressure					0.099								N		No ice line present at LE heater/heater interface. May be because the MVD is higher, therefore partles spread out more upon impact and don't freeze at areas of no heat.
			Blue	Strip	60.2	1.93	31.1917	116.186	0.34	0.457005	0.461						N		One large ice shed observed. A few smaller ice sheds also heard.
				Auxillary Suction	60.1	2.22	27.0721	133.422	0.099	0.142134	0.142						N		Copper bus bars may be sinking out heat at areas of ice wall.
				Auxillary Pressure					0.099								N
2019-09-18	Test Case 21	Anti-Icing	White	Strip	70.3	2.21	31.81	155.363	0.334	0.611104	0.612	0.9	-8	35	400	3	Y		No delay, run for 3 mins
				Auxillary Suction	70.3	2.48	28.3468	174.344	0.099	0.185728	0.186						N		LE completely clean. No ice line where LE heaters meet
				Auxillary Pressure					0.099								N		Aux heater still has some ice. Located further back from overlap.
			Blue	Strip	70.3	2.21	31.81	155.363	0.34	0.611104	0.611						Y
				Auxillary Suction	70.2	2.55	27.5294	179.01	0.099	0.190698	0.19						N
				Auxillary Pressure					0.099								N
	Test Case 22	Anti-Icing	White	Strip	70.3	2.26	31.1062	158.878	0.334	0.62493	0.625	0.9	-8	35	400	10	Y		No delay, run for 10 mins
				Auxillary Suction	70.3	2.52	27.8968	177.156	0.099	0.188723	0.1885						N		The aux heaters need more PD
				Auxillary Pressure					0.099								N		LE heaters no ice
			Blue	Strip	70.3	2.26	31.1062	158.878	0.34	0.62493	0.624						Y
				Auxillary Suction	70.2	2.55	27.5294	179.01	0.099	0.190698	0.19						N
				Auxillary Pressure					0.099								N
	Test Case 23	Anti-Icing	White	Strip	70.3	2.26	31.1062	158.878	0.334	0.62493	0.625	0.9	-8	35	400	3	Y		No delay, run for 3 mins
				Auxillary Suction	80.1	2.81	28.5053	225.081	0.099	0.239777	0.24						N		LE heaters no ice
				Auxillary Pressure					0.099								N		The aux heaters are ALMOST there!
			Blue	Strip	70.3	2.21	31.81	155.363	0.34	0.611104	0.612						Y		Run next test for 10 mins to exploit the ice build up on the aux heaters
				Auxillary Suction	80.4	2.91	27.6289	233.964	0.099	0.24924	0.249						N
				Auxillary Pressure					0.099								N
	Test Case 24	Anti-Icing	White	Strip	70.3	2.26	31.1062	158.878	0.334	0.62493	0.625	0.9	-8	35	400	10	Y		No delay, run for 10 mins
				Auxillary Suction	80.1	2.85	28.1053	228.285	0.099	0.243191	0.243						N		LE heaters no ice. Aux heaters still have ice.
				Auxillary Pressure					0.099								N		Ice on aux heaters is forming behind the LE/aux overlap.
			Blue	Strip	70.3	2.26	31.1062	158.878	0.34	0.62493	0.624						Y
				Auxillary Suction	80.4	2.91	27.6289	233.964	0.099	0.24924	0.249						N
				Auxillary Pressure					0.099								N
	Test Case 25	Anti-Icing	White	Strip	70.3	2.26	31.1062	158.878	0.334	0.62493	0.625	0.9	-8	35	400	3	Y		No delay, run for 3 mins
				Auxillary Suction	90.1	3.18	28.3333	286.518	0.099	0.305226	0.305						N		LE heaters no ice.
				Auxillary Pressure					0.099								N		Ice on aux heaters very minimal. White aux heater appears to have ice only where seam sealer is.
			Blue	Strip	70.3	2.26	31.1062	158.878	0.34	0.62493	0.624						Y		Blue aux heater appears to have some run back icing
				Auxillary Suction	90.2	3.24	27.8395	292.248	0.099	0.31133	0.311						N		Run for 10 mins to see how ice shapes look.
				Auxillary Pressure					0.099								N
	Test Case 26	Anti-Icing	White	Strip	70.3	2.26	31.1062	158.878	0.334	0.62493	0.625	0.9	-8	35	400	10	Y		No delay, run for 10 mins
				Auxillary Suction	90.1	3.18	28.3333	286.518	0.099	0.305226	0.305						N		LE heaters no ice. Aux heaters still have ice
				Auxillary Pressure					0.099								N		Decided to not chase min PD on Aux as it's not feasible in actual application
			Blue	Strip	70.3	2.26	31.1062	158.878	0.34	0.62493	0.624						Y		Runback water refreezing at aux appears to be the major problem. Coatings should help with this if we were to test with them.
				Auxillary Suction	90.2	3.27	27.5841	294.954	0.099	0.314213	0.314						N
				Auxillary Pressure					0.099								N
	Test Case 27	Anti-Icing	White	Strip	65.3	2.07	31.5459	135.171	0.334	0.531681	0.533	0.9	-8	35	400	3	Y		No delay, run for 3 mins
				Auxillary Suction	65.2	2.32	28.1034	151.264	0.099	0.161141	0.161						N		LE heaters have no ice. Aux heaters stil have ice.
				Auxillary Pressure					0.099								N		Appears the min PD for LE is between 0.468 and 0.533
			Blue	Strip	65.6	2.07	31.6908	135.792	0.34	0.534123	0.534						Y
				Auxillary Suction	65.3	2.35	27.7872	153.455	0.099	0.163475	0.163						N
				Auxillary Pressure					0.099								N
	Test Case 28	Anti-Icing	White	Strip	65.3	2.12	30.8019	138.436	0.334	0.544523	0.547	0.9	-8	35	400	10	Almost		No delay, run for 10 mins
				Auxillary Suction	65.2	2.35	27.7447	153.22	0.099	0.163224	0.163						N		LE heaters are mostly clean. A lot of run back ice appears present. Odd ice shapes still forming
				Auxillary Pressure					0.099								N		Severe ice at LE/Aux interface.
			Blue	Strip	65.6	2.12	30.9434	139.072	0.34	0.547025	0.548						Almost		Coatings may be the next best solution as all PD's are higher than ideal and runback ice looks like it will be a problem
				Auxillary Suction	65.3	2.35	27.7872	153.455	0.099	0.163475	0.163						N
				Auxillary Pressure					0.099								N
Icing Conditions - WARMER TEMPERATURE
	Test ID	Test Type	Blade	Heater	Variac (VAC)	RMS Current (A)	Heater Resistance (ohms)	Power (Watts)		Power Density (W/cm^2)	Power Density Labview (W/cm^2)	LWC (g/m^3)	Temp (C)	MVD (microns)	Test RPM	Time of Test (mins)	Anti-Iced (Yes or No)	Ice Thickness (mm) / Melting Time (s)
2019-09-18	Test Case 29	BASELINE NO HEAT	White	Strip	0	0	0	0	0.334	0	0	0.5	-4	20	400	10	Baseline (N/A)	~5	Baseline test for 10 min run
				Auxillary Suction	0	0	0	0	0.099	0	0
				Auxillary Pressure					0.099
			Blue	Strip	0	0	0	0	0.34	0	0							~5
				Auxillary Suction	0	0	0	0	0.099	0	0
				Auxillary Pressure					0.099
	Test Case 30	Anti-Icing	White	Strip	50.3	1.66	30.3012	83.498	0.334	0.328431	0.327	0.5	-4	20	400	3	Y		No delay, run for 3 mins
				Auxillary Suction	50.6	1.79	28.2682	90.574	0.099	0.096488	0.096						Y		Both LE and Aux heaters are ice free. Considered successful test at current DuPont heater system PD's
				Auxillary Pressure					0.099								Y		Slight ice formation on Aux heaters, but very light. Will run 10 min test to see if it gets more severe.
			Blue	Strip	50.7	1.61	31.4907	81.627	0.34	0.321071	0.32						Y
				Auxillary Suction	50.5	1.79	28.2123	90.395	0.099	0.0962973	0.096						Y
				Auxillary Pressure					0.099								Y
	Test Case 31	Anti-Icing	White	Strip	50.3	1.66	30.3012	83.498	0.334	0.328431	0.327	0.5	-4	20	400	10	Y		No delay, run for 10 mins
				Auxillary Suction	50.6	1.83	27.6503	92.598	0.099	0.0986441	0.098						N		LE clean of ice. Aux heaters have odd ice shapes on back side. Need to bump up PD
				Auxillary Pressure					0.099								N
			Blue	Strip	50.7	1.65	30.7273	83.655	0.34	0.329048	0.329						Y
				Auxillary Suction	50.5	1.86	27.1505	93.93	0.099	0.100063	0.1						N
				Auxillary Pressure					0.099								N
	Test Case 32	Anti-Icing	White	Strip	50.3	1.66	30.3012	83.498	0.334	0.328431	0.327	0.5	-4	20	400	3	Y		No delay, run for 3 mins
				Auxillary Suction	60.4	2.16	27.963	130.464	0.099	0.138983	0.138						Almost		LE clean of ice. Very minor ice drops at LE heater/heater interface.
				Auxillary Pressure					0.099								Almost		Aux heaters mostly ice free. Some very light icing. Will run 10 min test to see how severe it becomes
			Blue	Strip	50.7	1.61	31.4907	81.627	0.34	0.321071	0.32						Y
				Auxillary Suction	60.3	2.22	27.1622	133.866	0.099	0.142607	0.142						Almost
				Auxillary Pressure					0.099								Almost
	Test Case 33	Anti-Icing	White	Strip	50.3	1.66	30.3012	83.498	0.334	0.328431	0.327	0.5	-4	20	400	10	N		No delay, run for 10 mins
				Auxillary Suction	60.4	2.16	27.963	130.464	0.099	0.138983	0.139						N		LE mostly clean of ice, but ice line where LE heaters meet is present. Not sure why it's showing up on this test at higher Aux PD and not on Test # 31??
				Auxillary Pressure					0.099								N		Small ice wall present at LE / Aux heater overlap. Not uniform across entire overlap
			Blue	Strip	50.7	1.61	31.4907	81.627	0.34	0.321071	0.32						N
				Auxillary Suction	60.3	2.22	27.1622	133.866	0.099	0.142607	0.142						N
				Auxillary Pressure					0.099								N
	Test Case 34	Anti-Icing	White	Strip	60.3	1.93	31.2435	116.379	0.334	0.457764	0.458	0.5	-4	20	400	3	Y		No delay, run for 3 mins
				Auxillary Suction	60.4	2.16	27.963	130.464	0.099	0.138983	0.139						Y		All areas of blade are ice free
				Auxillary Pressure					0.099								Y
			Blue	Strip	60.3	1.89	31.9048	113.967	0.34	0.448277	0.447						Y
				Auxillary Suction	60.3	2.19	27.5342	132.057	0.099	0.14068	0.14						Y
				Auxillary Pressure					0.099								Y			-
	Test Case 35	Anti-Icing	White	Strip	60.3	1.98	30.4545	119.394	0.334	0.469624	0.469	0.5	-4	20	400	10	Y		No delay, run for 10 mins
				Auxillary Suction	60.4	2.19	27.5799	132.276	0.099	0.140913	0.14						Y		All areas ice free. Small ice chunks on blade where edge sealer is present. Still considered anti-iced.
				Auxillary Pressure					0.099								Y		W1 thermistor has gone bad
			Blue	Strip	60.5	1.93	31.3472	116.765	0.34	0.459283	0.459						Y
				Auxillary Suction	60.3	2.19	27.5342	132.057	0.099	0.14068	0.14						Y
				Auxillary Pressure					0.099								Y
	Test Case 36	Anti-Icing	White	Strip	55.1	1.8	30.6111	99.18	0.334	0.390114	0.389	0.5	-4	20	400	3	Y		No delay, run for 3 mins
				Auxillary Suction	55.1	1.96	28.1122	107.996	0.099	0.115048	0.115						Y		All area are ice free. Very minor ice partcles at LE/Aux interface. May see more ice in 10 min test
				Auxillary Pressure					0.099								Y
			Blue	Strip	54.7	1.7	32.1765	92.99	0.34	0.365766	0.365						Y
				Auxillary Suction	55.1	2.02	27.2772	111.302	0.099	0.118569	0.118						Y
				Auxillary Pressure					0.099								Y
	Test Case 37	Anti-Icing	White	Strip	55.3	1.8	30.7222	99.54	0.334	0.39153	0.39	0.5	-4	20	400	10	Y		No delay, run for 10 mins
				Auxillary Suction	55.1	1.99	27.6884	109.649	0.099	0.116808	0.116						Almost		LE is anti-iced. Small ice patches are present on Aux. May be influenced due to edge sealer.
				Auxillary Pressure					0.099								Almost
			Blue	Strip	55.1	1.7	32.4118	93.67	0.34	0.368441	0.368						Y
				Auxillary Suction	55.1	1.99	27.6884	109.649	0.099	0.116808	0.116						Almost
				Auxillary Pressure					0.099								Almost
Icing Conditions - COLDER TEMPERATURE
	Test ID	Test Type	Blade	Heater	Variac (VAC)	RMS Current (A)	Heater Resistance (ohms)	Power (Watts)		Power Density (W/cm^2)	Power Density Labview (W/cm^2)	LWC (g/m^3)	Temp (C)	MVD (microns)	Test RPM	Time of Test (mins)	Anti-Iced (Yes or No)	Ice Thickness (mm) / Melting Time (s)
2019-09-20	Test Case 38	BASELINE NO HEAT	White	Strip	0	0	0	0	0.334	0		0.5	-12	20	400	10	Baseline (N/A)
				Auxillary Suction	0	0	0	0	0.099	0
				Auxillary Pressure					0.099
			Blue	Strip	0	0	0	0	0.34	0
				Auxillary Suction	0	0	0	0	0.099	0
				Auxillary Pressure					0.099
	Test Case 39	Anti-Icing	White	Strip			#DIV/0!	0	0.334	0		0.5	-12	20	400	3
				Auxillary Suction			#DIV/0!	0	0.099	0
				Auxillary Pressure					0.099
			Blue	Strip			#DIV/0!	0	0.34	0
				Auxillary Suction			#DIV/0!	0	0.099	0
				Auxillary Pressure					0.099
	Test Case 40	Anti-Icing	White	Strip			#DIV/0!	0	0.334	0		0.5	-12	20	400	10
				Auxillary Suction			#DIV/0!	0	0.099	0
				Auxillary Pressure					0.099
			Blue	Strip			#DIV/0!	0	0.34	0
				Auxillary Suction			#DIV/0!	0	0.099	0
				Auxillary Pressure					0.099
	Test Case 41	Anti-Icing	White	Strip			#DIV/0!	0	0.334	0		0.5	-12	20	400	3
				Auxillary Suction			#DIV/0!	0	0.099	0
				Auxillary Pressure					0.099
			Blue	Strip			#DIV/0!	0	0.34	0
				Auxillary Suction			#DIV/0!	0	0.099	0
				Auxillary Pressure					0.099
	Test Case 42	Anti-Icing	White	Strip			#DIV/0!	0	0.334	0		0.5	-12	20	400	10
				Auxillary Suction			#DIV/0!	0	0.099	0
				Auxillary Pressure					0.099
			Blue	Strip			#DIV/0!	0	0.34	0
				Auxillary Suction			#DIV/0!	0	0.099	0
				Auxillary Pressure					0.099
	Test Case 43	Anti-Icing	White	Strip			#DIV/0!	0	0.334	0		0.5	-12	20	400	3
				Auxillary Suction			#DIV/0!	0	0.099	0
				Auxillary Pressure					0.099
			Blue	Strip			#DIV/0!	0	0.34	0
				Auxillary Suction			#DIV/0!	0	0.099	0
				Auxillary Pressure					0.099
	Test Case 44	Anti-Icing	White	Strip			#DIV/0!	0	0.334	0		0.5	-12	20	400	10
				Auxillary Suction			#DIV/0!	0	0.099	0
				Auxillary Pressure					0.099
			Blue	Strip			#DIV/0!	0	0.34	0
				Auxillary Suction			#DIV/0!	0	0.099	0
				Auxillary Pressure					0.099
	Test Case 45	Anti-Icing	White	Strip			#DIV/0!	0	0.334	0		0.5	-12	20	400	3
				Auxillary Suction			#DIV/0!	0	0.099	0
				Auxillary Pressure					0.099
			Blue	Strip			#DIV/0!	0	0.34	0
				Auxillary Suction			#DIV/0!	0	0.099	0
				Auxillary Pressure					0.099
	Test Case 46	Anti-Icing	White	Strip			#DIV/0!	0	0.334	0		0.5	-12	20	400	10
				Auxillary Suction			#DIV/0!	0	0.099	0
				Auxillary Pressure					0.099
			Blue	Strip			#DIV/0!	0	0.34	0
				Auxillary Suction			#DIV/0!	0	0.099	0
				Auxillary Pressure					0.099
